# Supplementary material
Source: Springer Nature journal article supplement (https://www.springermedizin.de/resource/supplementary/12958_2009_514_MOESM6_ESM.pdf/9568186)

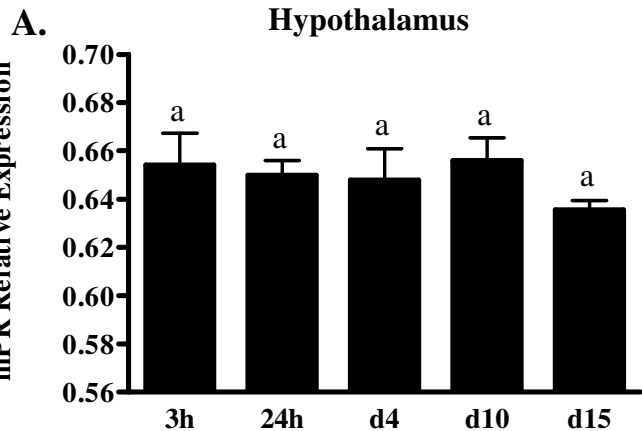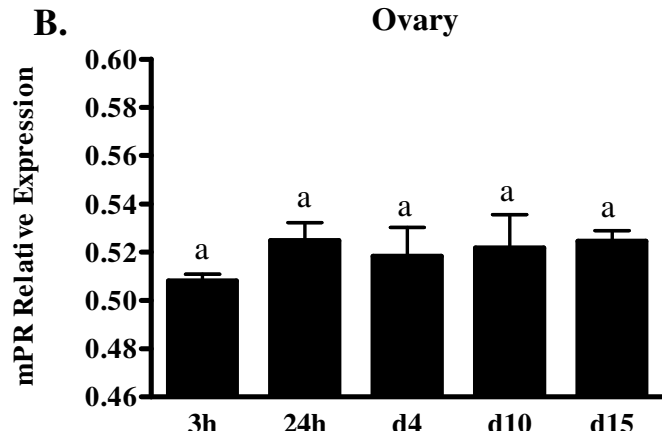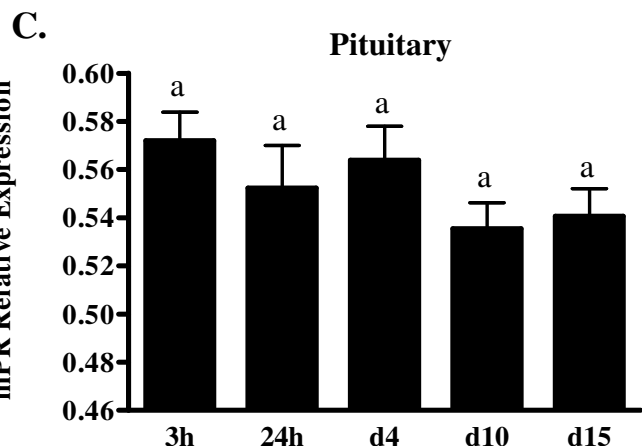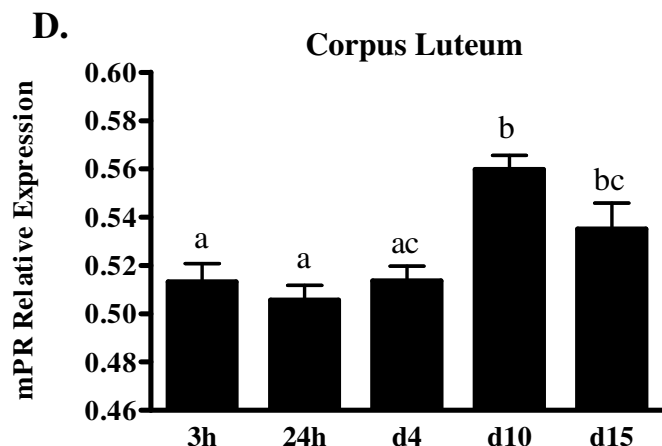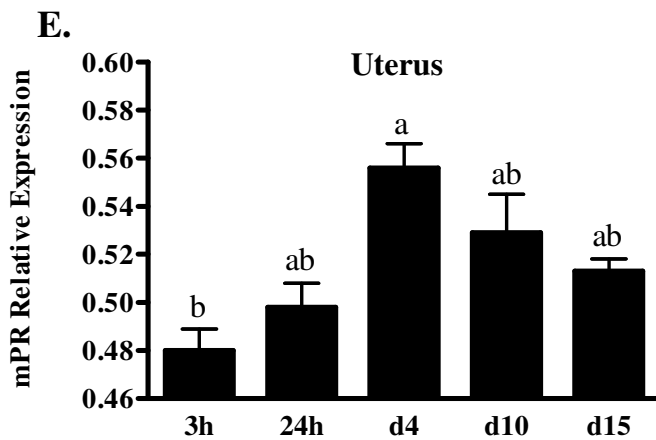

Supplement: MOESM6 [file 9568186]
